# Supplementary material for: Guidance on the Conduct of Clinical Research within OECD Countries during the Early Stages of the COVID-19 Pandemic: A Systematic Review
Source: MDPI journal article supplement (doi:10.3390/pharmacy11010015), 2023-01-12
Supplement: s1 [file s1]

## Supplementary File S1 - Database Search Strategy

|                 |                                                                                                          |
|-----------------|----------------------------------------------------------------------------------------------------------|
| <b>Database</b> | <b>MEDLINE and Embase</b>                                                                                |
| <b>Date</b>     | <b>28/04/2021</b>                                                                                        |
| <b>Strategy</b> | <b>#1 AND #2 AND #3</b>                                                                                  |
| <b>#1</b>       | COVID-19 OR (Covid-19 or Covid 19).mp OR corona*.mp OR Pandemics OR Coronavirus OR pandemic.mp           |
| <b>#2</b>       | exp clinical trial OR ((clinical or control*) and trial*).mp. OR exp Clinical Trials as Topic OR RCT*.MP |
| <b>#3</b>       | guideline/ or practice guideline OR guide*.mp. OR recommendation*.mp. OR                                 |
| <b>Filters</b>  | English language and yr="2020-Current"                                                                   |

|                 |                                                                                          |
|-----------------|------------------------------------------------------------------------------------------|
| <b>Database</b> | <b>PubMed</b>                                                                            |
| <b>Date</b>     | <b>28/04/2021</b>                                                                        |
| <b>Strategy</b> | <b>#1 AND #2 AND #3</b>                                                                  |
| <b>#1</b>       | COVID OR COVID-19 OR corona* OR pandemic                                                 |
| <b>#2</b>       | RCT* OR "randomized control* trial*" OR "clinical trial*" OR "randomised control* trial" |
| <b>#3</b>       | (guidelines or guid* or practice* or practise*)                                          |
| <b>Filters</b>  | English language and yr="2020-Current"                                                   |

|                 |                                                                                          |
|-----------------|------------------------------------------------------------------------------------------|
| <b>Database</b> | <b>Trip</b>                                                                              |
| <b>Date</b>     | <b>28/04/2021</b>                                                                        |
| <b>Strategy</b> | <b>#1 AND #2 AND #3</b>                                                                  |
| <b>#1</b>       | COVID OR COVID-19 OR corona* OR pandemic                                                 |
| <b>#2</b>       | RCT* OR "randomized control* trial*" OR "clinical trial*" OR "randomised control* trial" |
| <b>#3</b>       | Guid* OR guideline* OR recommendation* OR practice*                                      |
| <b>Filters</b>  | English language and yr="2020-Current"                                                   |

|                 |                                        |
|-----------------|----------------------------------------|
| <b>Database</b> | <b>G-I-N</b>                           |
| <b>Date</b>     | <b>28/04/2021</b>                      |
| <b>Strategy</b> | <b>#1 AND #2</b>                       |
| <b>#1</b>       | COVID                                  |
| <b>#2</b>       | Clinical trial                         |
| <b>Filters</b>  | English language and yr="2020-Current" |
